# Supplementary material for: EHBP1L1 coordinates Rab8 and Bin1 to regulate apical-directed transport in polarized epithelial cells
Source: PubMed Central journal article supplement — J Cell Biol. 2016 Feb 1;212(3):297–306. doi: 10.1083/jcb.201508086 (PMC4739609; doi:10.1083/jcb.201508086), 2016-02-01
Supplement: JCB_201508086_sm.pdf [file JCB_201508086_sm.pdf]

Nakajo et al., <http://www.jcb.org/cgi/content/full/jcb.201508086/DC1>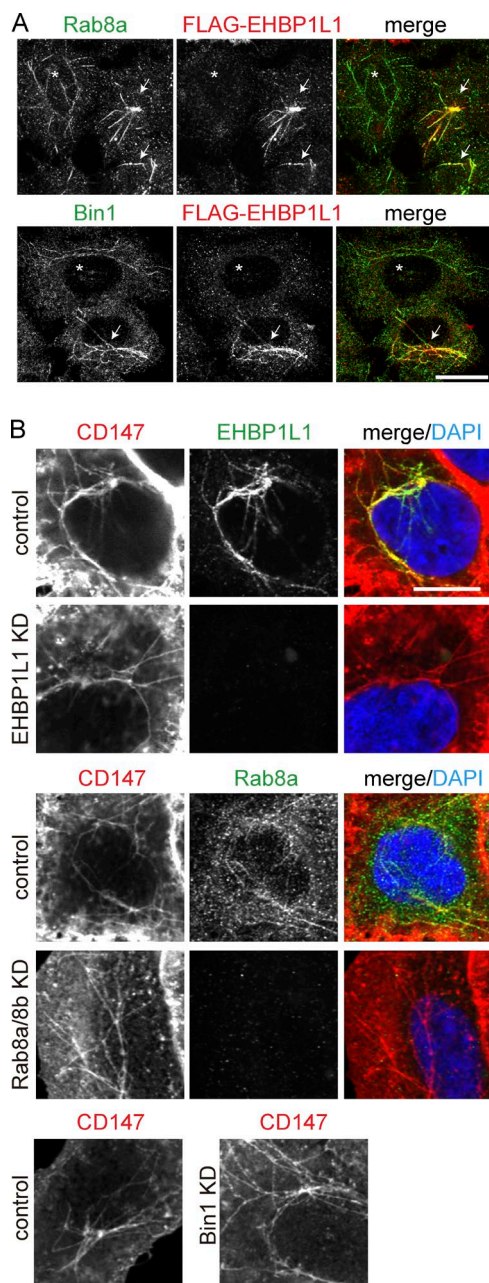

Figure S1. **Overexpression of EHBP1L1 enhances Rab8 and Bin1 localization at the tubules.** (A) Immunofluorescence for Rab8a, Bin1, and FLAG-EHBP1L1 in HeLa cells. FLAG-EHBP1L1-expressing cells (arrows) showed more intense Rab8a and Bin1 signals than untransfected cells (asterisks). Bar, 20 μm. (B) HeLa cells were untreated or treated with siRNA for EHBP1L1, Rab8a/8b, or Bin1 for 72 h; fixed; and stained with CD147, EHBP1L1, or Rab8a antibodies. Bar, 10 μm.

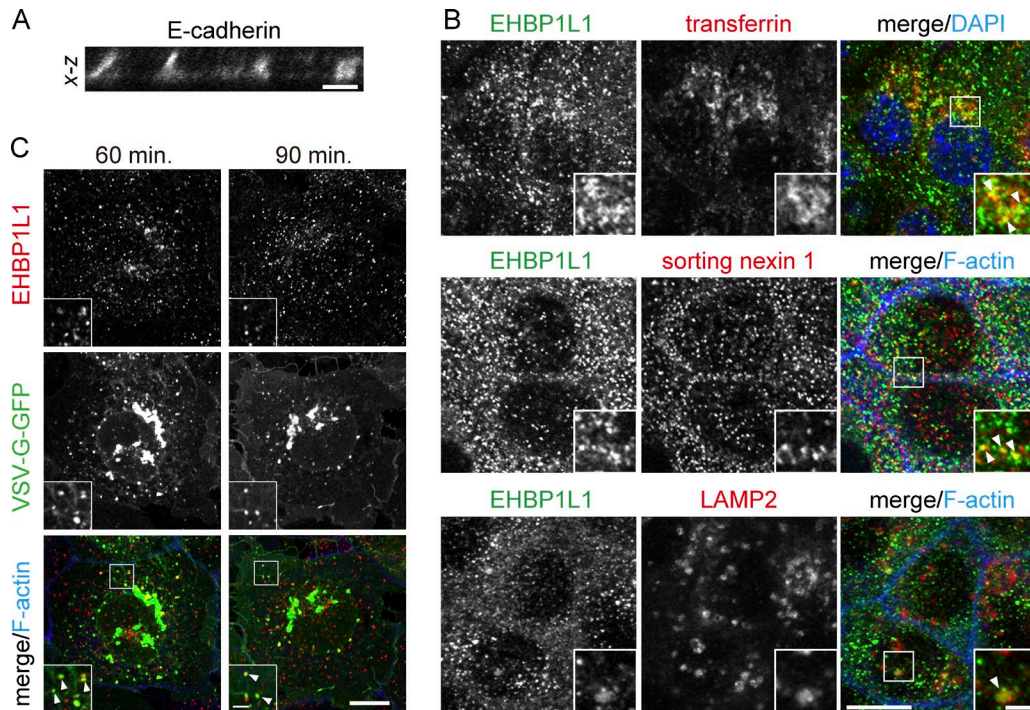

Figure S2. **Subcellular localization of EHP1L1 in EpH4 cells.** (A) EpH4 cells at 100% confluence were fixed and stained with the basolateral marker protein E-cadherin and DAPI. The confocal x-z section is shown. Bars, 5  $\mu$ m. (B) EpH4 cells were immunostained with either EHP1L1 or internalized Alexa Fluor 594-transferrin, sorting nexin 1 (SNX1), and Lamp2, which label the ERC, sorting/early endosomes, and late endosome/lysosomes, respectively. Cells were also stained with either DAPI or Alexa Fluor 633 phalloidin. Insets show enlarged views; arrowheads in the insets show colocalization. Bars: (magnified views) 2  $\mu$ m; (other views) 10  $\mu$ m. (C) EpH4 cells expressing VSV-G<sup>ts045</sup>-GFP were cultured at 40°C and incubated for 60 and 90 min at 32°C. The cells were fixed at each time point and stained using a EHP1L1 antibody and Alexa Fluor 633 phalloidin. Insets show enlarged views; arrowheads in the insets show colocalization. Bars: (magnified views) 2  $\mu$ m; (other views) 10  $\mu$ m.
